## A genomic island of *Streptomyces coelicolor* harbors the self-contained regulon of an ECF sigma factor

Camilla M. Kao<sup>1□\*</sup>, Nitsara Karoonuthaisiri<sup>1□a□</sup>, David Weaver<sup>1□b□</sup>, Jonathan A. Vroom<sup>1□c</sup>, Shuning A. Gai<sup>1□d</sup>, Mai-Lan Ho<sup>1□e</sup>, and Kedar G. Patel<sup>1□f</sup>

1 Department of Chemical Engineering, Stanford University, Stanford, California, United States of America

□ These authors contributed equally to this work.

□ Current Address: School of Engineering, Stanford University, Stanford, California, United States of America

□a Current Address: Biosensing Technology Research Unit, National Center for Engineering and Biotechnology, Pathum Thani, Thailand

□b Current Address: ERM: Environmental Resources Management, San Francisco, California, United States of America

□c Current Address: Codexis, Redwood City, California, United States of America

□d Current Address: Molecular Biology, Prothena Biosciences, South San Francisco, California, United States of America

□e Current Address: Department of Radiology, Mayo Clinic, Rochester, Minnesota, United States of America

□f Current Address: Zymergen, Inc., Emeryville, California, United States of America

\* cammy@stanford.edu

### Abstract

Streptomyces make up the largest genus of actinobacteria, living predominantly in soil and decaying vegetation. The bacteria are widely known for their filamentous morphologies and their capacity to synthesize antibiotics and other biologically active molecules. More than a decade ago, we and others identified 22 genomic islands that

*Streptomyces coelicolor* M145 possesses and other *Streptomyces* strains lack. One of these genomic islands, Genomic Island (GI) 6, encodes an extracytoplasmic function (ECF) sigma factor that we were characterizing in separate work. Here we report that artificial induction of the ECF sigma factor, which is encoded by SCO3450, causes the transcription of approximately one-fourth of the genomic island, or ~26 mostly contiguous genes, to increase. These data suggest that the ECF sigma factor and its regulon are a self-contained transcriptional unit that can be transferred by horizontal gene transfer. To our knowledge, only one other example has been identified of an ECF sigma factor and its contiguous regulon appearing to be transferrable by horizontal gene transfer [18,19].

More than half of the regulon harbored by GI 6 encodes putative enzymes involved in small molecule metabolism. A putative haloacid dehalogenase is present. Genes encoding two putative anti-sigma factors flank SCO3450, the three genes residing within the regulon. The regulon appears not to be induced by the 44 growth conditions recently examined by Byung-Kwan Cho and colleagues [20]. Therefore the regulon appears to confer fitness to *S. coelicolor* in as-yet unknown situations. The one or more activities required for fitness might range from scavenging to detoxification to communication within microbial communities.

## Introduction

Researchers began studying *Streptomyces* genetics in the second half of the 20th century because of the filamentous morphologies and biosynthetic capacities of the bacteria [1]. Many of the *Streptomyces* strains that were studied belong to a group of closely related “blue” streptomycetes that had been given various names, but probably should all have the same name [2]. During the early 2000’s, we characterized the genomes of six of these “blue” strains by using DNA microarrays: the sequenced strain [3], *S. coelicolor* M145, which derives from *S. coelicolor* A3(2), which in turn derives from Waksman’s strain 3443 [4]; Sermonti’s SE1 (John Innes (JI) strain 1152) [5]; Bradley’s S199 (JI 1153) [6]; *S. lividans* 66 (JI 1326) [7]; *S. lividans* ISP5434 (JI 2896), which contains the plasmid pIJ101 [8]; and *S. violaceoruber* SANK95570 (JI 3034), which contains the plasmid pSV1 that encodes the biosynthetic genes for the antibiotic methylenomycin [9]. That

study was described in the doctoral dissertation of co-author David Weaver [10]. Similar findings were reported by Jayapal et al., who examined *S. coelicolor* M145 and *S. lividans* TK21 [11].

By comparing the genome of *S. coelicolor* M145 to the five wild type genomes by using DNA microarrays, we identified 22 sets of contiguous genes in *S. coelicolor* M145 that are absent in the wild type strains [10]. We designated these genes Genomic Islands (GIs) 1 to 22. S1 Fig, S2 Fig, and S3 Fig show the GIs. The sizes of the GIs range from 3 kb to 150 kb and the number of ORFs within them from 3 to 148. *S. coelicolor* M145 likely acquired the 22 GIs by horizontal gene transfer, because they have the following characteristics: Direct repeats flank most of the GIs; the GIs contain regions with low G + C content; the GIs encode transposable elements such as invertases, recombinases, and transposons, as well as plasmid-related proteins; some GIs appear to have inserted into tRNA sequences; and the GIs have slightly lower gene expression during exponential growth [10,11]. We found that different wild type strains lack different GIs and have different boundaries at the sites corresponding to the GIs in *S. coelicolor* M145. We also identified DNA that the wild type strains possess and that *S. coelicolor* M145 lacks. Some of that DNA (corresponding to GIs 8, 14, 17, 18, and 19 in *S. coelicolor* M145) might be large segments, because we were unable to amplify the DNA by PCR [10]. The genomic islands have a relatively uniform distribution across the chromosome of *S. coelicolor* M145, with a slight abundance in the right chromosome arm [10,11].

A sigma factor is a specialized unit of RNA polymerase that permits the multisubunit enzyme to initiate transcription selectively. Extracytoplasmic function (ECF) sigma factors constitute the most abundant, smallest, and most divergent group of sigma factors [12]. Their name derives from many of their members having roles in sensing and responding to signals generated outside of the cell or in the cell membrane [13]. The genome of *S. coelicolor* M145 encodes 63 sigma factors, of which 49 belong to the ECF group [3]. During the early 2000's, we sought to identify regulons of *S. coelicolor* sigma factors by overexpressing each one individually and analyzing the response of the transcriptome by using DNA microarrays. The ECF sigma factor encoded by SCO3450 was evaluated as part of that work. While we were unaware of this fact at that time, SCO3450 is located in GI 6 [10].

The ECF sigma factor encoded by SCO3450 belongs to the subgroup ECF01 as

classified by Thorsten Mascher and colleagues in 2009 [14]. This subgroup includes RpoE-like sigma factors, of which the best studied is  $\sigma^W$  of *Bacillus subtilis*. Members of the ECF01 subgroup are widely distributed throughout bacterial phyla, but are absent in most actinobacteria, the phylum which includes the genus *Streptomyces* [15]. ECF01 sigma factors have been characterized experimentally to be involved in responses to envelope stress and the production and detoxification of antimicrobial compounds [14].

## Results and Discussion

### Genomic Island 6 encodes an ECF sigma factor and the regulon of the sigma factor

Table 1 lists the five wild type *Streptomyces* strains that we studied that lack GI 6 [10].

**Table 1. Strains that revealed the genomic islands of *S. coelicolor* M145.**

| Strain | Comment                                                                                          | Ref. |
|--------|--------------------------------------------------------------------------------------------------|------|
| M145   | <i>S. coelicolor</i> sequenced “reference” strain, SCP1- SCP2-                                   | [3]  |
| 1152   | <i>S. coelicolor</i> Sermonti’s SE1                                                              | [5]  |
| 1153   | <i>S. coelicolor</i> Bradley’s S199 strain                                                       | [6]  |
| 1326   | <i>S. lividans</i> 66                                                                            | [7]  |
| 2896   | <i>S. lividans</i> ISP5434-, the strain from which pIJ101 was isolated                           | [8]  |
| 3034   | <i>S. violaceoruber</i> SANK95570, harbors pSV1, which encodes methylenomycin biosynthetic genes | [9]  |

Fig 1 shows the boundaries of GI 6 (the lefthand columns) and the levels of transcripts, as measured by microarrays, after artificial induction of SCO3450 in the strain *S. coelicolor* M600 growing exponentially in a liquid culture (the righthand columns) [16]. Fifteen minutes after we induced the sigma factor, transcripts of approximately one-fourth of the genes in GI 6 increased in abundance. The genes numbered ~26: SCO3437 and SCO3442-3465; SCO3478 is an induced gene located 14 kb away from the other genes. Cross-hybridization does not explain the result for SCO3478 because the gene, which encodes a dehydrogenase, lacks sequence similarity to other *S. coelicolor* genes. SCO3450 is located among the induced genes (Fig 1, arrow; S4 Fig). Together these data suggest that the ECF sigma factor and its regulon are a self-contained transcriptional unit that can be transferred by horizontal gene transfer.

To our knowledge, the only other example of an ECF sigma factor and its regulon appearing to be transferrable by horizontal gene transfer is the system for cobalt and

**Fig 1. Genomic Island 6 and the regulon of the ECF sigma factor encoded by SCO3450.** GI 6 is 108 kb in length. The arrow indicates the location of SCO3450, which encodes a putative ECF sigma factor. See Table 1 for a list of the strains used to identify GI 6. To obtain the data in the figure, we used DNA microarrays that contained the 7825 predicted genes in the chromosome of *S. coelicolor* M145 [17]. For the lefthand columns, the maximum intensity of green corresponds to a 3-fold difference in signal on the microarrays for DNA in *S. coelicolor* M145 relative to DNA in the wild type strains. SCO3450 was overexpressed in an exponentially growing liquid culture (SMM) of a *S. coelicolor* M600 derivative, through the use of a thiostrepton-inducible promoter [16]. RNA was harvested from the culture immediately prior to the addition of thiostrepton and every 15 to 30 minutes afterwards for 90 minutes. cDNA of the initial RNA sample ( $OD_{450} \sim 0.5$ ) was labeled with the green fluorescent dye Cy3. cDNA of RNA isolated from subsequent time points was labeled with the red fluorescent dye Cy5. Yellow microarray spots for a particular time point represented genes with transcript levels equal to the levels of the initial time point. Red and green microarray spots represented genes induced and repressed, respectively, after the addition of thiostrepton. The yellow color is shown here as black for clarity. For the righthand columns, the maximum intensity of red corresponds to 8-fold induction of a given gene at a particular time relative to the beginning of the time course. A control experiment with a M600 derivative that lacks SCO3450 in the induction plasmid identified genes induced by thiostrepton. Labels on the right indicate ORF numbers and genes with names.

nickel resistance in the bacterium *Cupriavidus metallidurans* CH34 [18,19]. There, the plasmid pMOL28 contains six *cnr* genes that are organized in two adjacent operons of three genes each. The gene *cnrH* encodes the ECF sigma factor CnrH. Deletion and complementation of *cnrH* indicated that CnrH is essential for the regulation of the *cnr* system. When CnrH was present but the periplasmic sensor CnrX and the anti-sigma factor CnrY were absent, high-level constitutive expression was observed for the *cnr* genes [18].

### **The regulon of the ECF sigma factor contains conserved putative -35 and -10 promoter regions**

Byung-Kwan Cho and colleagues reported in 2016 transcription start sites of *S. coelicolor* genes induced by 44 growth conditions [20]. Those conditions included growth in rich media and many kinds of minimal media, growth in the liquid phase and on solid media, rapid growth to stationary phase, and several kinds of shocks. That study did not identify transcription start sites for the regulon of the ECF sigma factor encoded by SCO3450. This observation indicates that the regulon is not induced by the growth conditions examined by Jeong et al [20]. Perhaps *S. coelicolor* uses the regulon for circumstances that are not replicated in the laboratory, such as interactions in the

natural environment among different microbial species. 85

We used the bioinformatics tool PromoterHunter [21], combined with visual 86  
inspection of nucleotide sequences, to identify possible -35 and -10 promoter regions in 87  
the regulon of the ECF sigma factor. The conserved sequences for the -35 and -10 88  
promoter regions might be AACGG and CG, respectively (Fig 2). The promoters of 14 89  
genes contain these sequences exactly. The data suggest that operons might comprise 90  
SCO3445 to SCO3444, SCO3448 to SCO3446, SCO3455 to SCO3452, and SCO3463 to 91  
SCO3465 (see S4 Fig). Alternatively, genes not listed in Fig 2 might have promoters 92  
with less conserved -35 and -10 regions. Note that SCO3460 and SCO3478 do not 93  
possess the highly conserved promoter regions (see S4 Fig). In addition, that SCO3438 94  
has the conserved promoter regions supports the notion that this gene belongs to the 95  
regulon of the ECF sigma factor. In Fig 1, the lack of data for SCO3438 from all of the 96  
microarray hybridizations indicates that its spot on the microarrays was functioning 97  
poorly. 98

**Fig 2. Alignment of putative promoters in the regulon of the ECF sigma factor encoded by SCO3450.** Red letters indicate the putative -35 and -10 promoter regions. On the righthand side, the numbers in parentheses indicate the distance between each -10 promoter region and the start codon of the respective gene.

## The regulon of the ECF sigma factor encodes putative enzymes for small molecule metabolism 99 100

Recently we updated the annotations of the regulon of the ECF sigma factor by using 101  
EnsemblBacteria [22] and UniProt BLASTS [23]. Of the approximately 26 genes in the 102  
regulon, 15 encode putative enzymes for small molecule metabolism. 11 genes encode 103  
putative membrane and transport proteins. Four genes encode putative regulatory 104  
proteins. Four of the 26 genes fall into two categories. Only one gene lacks a putative 105  
function. S1 Table lists the annotations of each gene in the regulon. 106

### Enzymes encoded by the regulon of the ECF sigma factor 107

Table 2 lists the types of enzymes encoded by the regulon of the ECF sigma factor. The 108  
table excludes SCO3461 and SCO3462, because they lack gene expression data (Fig 1, 109  
righthand columns). 110

**Table 2. Types of enzymes encoded by the regulon of the ECF sigma factor.**

| Type                                   | Gene    | AA  | Putative Function                                                                                     | Other feature |
|----------------------------------------|---------|-----|-------------------------------------------------------------------------------------------------------|---------------|
| <b>CLEAVAGE</b>                        |         |     |                                                                                                       |               |
| Glycoside hydrolase                    | SCO3444 | 617 | glycoside hydrolase family 15/phosphorylase b kinase regulatory chain family; six-hairpin glycosidase |               |
| Nucleoside phosphorylase               | SCO3463 | 262 | nucleoside phosphorylase domain                                                                       |               |
| Dehalogenase                           | SCO3446 | 225 | haloacid dehydrogenase (HAD)-like domain                                                              |               |
| <b>REDOX</b>                           |         |     |                                                                                                       |               |
| Glutaredoxin                           | SCO3442 | 114 | glutaredoxin (DNA synthesis?)                                                                         |               |
| Oxidoreductase                         | SCO3443 | 454 | pyridine nucleotide-disulphide oxidoreductase; dihydrolipoyl dehydrogenase?                           |               |
|                                        | SCO3460 | 505 | pyridine nucleotide-disulphide oxidoreductase; dihydrolipoamide dehydrogenase?                        |               |
| Dehydrogenase                          | SCO3478 | 344 | D-isomer specific 2-hydroxyacid dehydrogenase                                                         |               |
| <b>TRANSFER</b>                        |         |     |                                                                                                       |               |
| Methyltransferase                      | SCO3452 | 359 | S-adenosyl-L-methionine-dependent methyltransferase                                                   |               |
|                                        | SCO3459 | 287 | S-adenosyl-L-methionine-dependent methyltransferase                                                   |               |
| Phosphatidyltransferase?               | SCO3457 | 205 | CDP-alcohol phosphatidyltransferase; YnjF?                                                            | transmembrane |
| Nucleotide-diphospho-sugar transferase | SCO3464 | 210 | nucleotide-diphospho-sugar transferases; transferase 1, rSAM/selenodomain-associated                  |               |
|                                        | SCO3465 | 236 | nucleotide-diphospho-sugar transferase; transferase 2, rSAM/selenodomain-associated                   |               |
| <b>MISC.</b>                           |         |     |                                                                                                       |               |
| Enzyme?                                | SCO3445 | 55  | low to moderate homology to small regions of seven larger proteins, which include enzymes             | membrane      |

AA = amino acids.

The putative enzymes fall into three general groups. One group possibly catalyzes the cleavage of small molecules. The group includes a glycoside hydrolase, a nucleoside phosphorylase, and a haloacid dehalogenase. A second group of enzymes might catalyze oxidation and reduction reactions. The group includes a glutaredoxin-like protein, two oxidoreductases, and a dehydrogenase. The third group of enzymes might catalyze transfer reactions. The group includes two methyltransferases, perhaps a phosphatidyltransferase, and two nucleotide-diphospho sugar transferases. A final gene, SCO3445, encodes a small membrane protein that has 30-50% identity to small regions of seven larger proteins, a set which includes several enzymes.

The composition of the enzymes in the regulon of the ECF sigma factor suggests

that the regulon might help to metabolize small molecules. A mixture of compounds  
might be being degraded: sugars, nucleosides and nucleotides, and lipids for the  
purposes of energy and biosynthesis; halogenated molecules for detoxification. Because  
the regulon encodes a set of putative enzymes with diverse substrates, the small  
molecules might be coming from the environment, for example, from neighboring  
cellular compartments or hyphae that are lysing due to hostile conditions.

Haloacid dehalogenases (HADs) belong to a large superfamily of hydrolases with  
diverse substrate specificity [24]. Type II HADs catalyze the hydrolytic dehalogenation  
of small L-2-haloalkanoic acids to yield the corresponding D-2-hydroxyalkanoic  
acids [25]. Because many *Streptomyces* bacteria produce halogenated antibiotics [26,27],  
the dehalogenase encoded by SCO3446 might serve to defend *S. coelicolor* against  
competitors in the environment by helping to catabolize antibiotics.

The following pairs of genes have no significant similarity, such that no  
cross-hybridization on the microarrays should have occurred: SCO3452 and SCO3449,  
which encode the methyltransferases; SCO3443 and SCO3460, which encode the  
oxidoreductases; and SCO3464 and SCO3465, which encode the  
nucleotide-diphospho-sugar transferases (Table 2).

### **Anti-sigma factors within the regulon of the ECF sigma factor**

Two genes that possibly encode anti-sigma factors flank SCO3450, the gene encoding  
the ECF sigma factor. The gene product of SCO3451 encodes a 103-amino-acid protein.  
A UniProt BLAST shows that the protein has approximately 40% identity with varying  
coverages to putative anti-sigma factors of other bacterial species, including putative  
transmembrane anti-sigma factors. The Constrained Consensus TOPology (CCTOP)  
prediction server [28] predicts with a reliability of 95.9069 that SCO3451 encodes a  
protein with one transmembrane segment (S5 Fig). The gene product of SCO3451 also  
contains a putative zinc-finger found in some anti-sigma factor proteins (S6 Fig). This  
zinc finger domain overlaps with the predicted transmembrane domain.

SCO3449 encodes a 106-amino-acid protein. A UniProt BLAST shows that the  
protein has approximately 40% identity with coverages around 50% to putative  
anti-sigma factors in other bacterial species, including putative transmembrane  
anti-sigma factors. However, according to CCTOP, the protein does not contain a



transmembrane domain. Like the putative anti-sigma factor encoded by SCO3451, the putative anti-sigma factor encoded by SCO3449 contains a possible zinc-finger found in some anti-sigma factor proteins (S7 Fig).

Microarray data are lacking for the expression of SCO3449 (Fig 1, righthand columns), such that inferences about the role of this gene in comparison to those of the induced genes should be made with caution. However, because microarray data are available for this gene in the hybridizations that identified the genomic islands (Fig 1, lefthand columns), the spot on the microarrays that represented this gene was likely intact. It is possible that a low abundance of transcripts of SCO3449 in both the reference and experimental samples of mRNA produced poor signals from the microarray spot of the gene.

### **Membrane and transport proteins encoded by the regulon of the ECF sigma factor**

Four contiguous genes in the regulon of the ECF sigma factor, SCO3453 to SCO3456, encode proteins that likely constitute an ABC transporter system. UniProt BLASTS show that all of the proteins have 45-50% identity with coverages greater than 95% to homologs with putative functions in spermidine and putrescine transport in other bacterial species. In particular, the species include *Geodermatophilus* and *Wenzinia*. Spermidine is a polyamine involved in cellular metabolism that can be used to stimulate RNA polymerase. Putrescine attacks S-adenosyl methionine and converts it to spermidine [29].

The putative transporters Sco3454 and Sco3455 have 34% identity with each other, the coverage being 44% between the C-terminal portions of the proteins.

### **Genomic Island 6 consists of four segments with transposases at their boundaries**

In addition to the regulon of the ECF sigma factor, we updated the annotations of the other genes of Genomic Island 6 by using EnsemblBacteria and UniProt BLASTS (S2 Table). In the table, the location of the regulon is denoted by the words “REGULON HERE.”

The length of GI 6 is 108 kb. The genomic island consists of four segments of DNA bounded by transposases (S2 Table, pink color). Three of the four segments have coherent putative functions: the oxidation and reduction of copper (S2 Table, blue color); a characterized agarase encoded by *dagA* [30,31]; and the utilization of sugars (S2 Table, yellow color). Included in the latter segment are a putative *lacI*-family transcriptional regulator and a putative  $\beta$ -galactosidase. A large fourth segment encodes putative enzymes and many hypothetical proteins.

The coherent functions of at least three of the four segments of GI 6 indicate that significant portions of the island might be “active.” If so, the regulon of the ECF sigma factor is likely active as well. While a nucleotide blast of the regulon of the ECF sigma factor yielded no similar segments of DNA in other sequenced organisms, the value to *S. coelicolor* of the regulon for as-yet unknown reasons is indicated by the presence of the regulon on a genomic island. It would be interesting to determine how common the regulon is among natural populations of microbes and whether the regulon moves easily between hosts.

## Materials and methods

### Construction of a *S. coelicolor* strain that overexpresses SCO3450

SCO3450, the gene which encodes the ECF sigma factor harbored by GI 6, was amplified by PCR and cloned into the conjugative plasmid pIJ6902 [32] by using the restriction sites *NdeI* and *BglII*. These restriction sites placed the gene immediately downstream of the thiostrepton-inducible promoter *tipAp*. The resulting plasmid was transformed into the methylation-deficient strain ET12567 with a non-transmissible helper plasmid, pUZ8002, and conjugated into *S. coelicolor* M600 as described by Kieser et al. [33]. The exconjugants were selected by an overlay of 50  $\mu\text{g}/\text{mL}$  of apramycin.

### Time course of the overexpression strain

Supplemented minimal medium (SMM) was inoculated with approximately  $5 \times 10^7$  spores/mL of a spore stock. The culture was grown at 30°C to early exponential phase,

which corresponded to a cell density of  $OD_{450} \sim 0.5$ . A reference sample, designated “0 min,” was harvested. To induce transcription of SCO3450, thiostrepton was added to the culture to a final concentration of  $30 \mu\text{g}/\text{mL}$ . Samples of the culture were harvested 15, 30, 45, 60, and 90 minutes after induction of SCO3450.

### **Extraction of total RNA from the overexpression strain**

Samples of cells from liquid cultures were recovered by filtration on Whatman filter paper (15-20 mm diameter; catalog #1002 055). RNA was isolated using the modified Kirby mix protocol as described previously [34] with the following modifications: Harvested volumes ranged between 5 mL and 20 mL, depending on the cell densities. RNA samples were treated only once with DNase I (50-70 units; RNase-free, Invitrogen) for 15 minutes at room temperature.

### **DNA microarray experiments for the overexpression strain**

Samples of cDNA were synthesized from total RNA as described previously [34]. cDNA of the reference sample was labeled with Cy3-CTP. cDNAs of the samples isolated at subsequent time points were labeled with Cy5-CTP. The cDNAs were hybridized to microarrays as described previously [34].

### **Identification of -35 and -10 conserved promoter regions in the regulon of the ECF sigma factor**

The tool PromoterHunter [21] was used to examine DNA upstream of the genes in the regulon of the ECF sigma factor. Weight matrices corresponding to AAC for the -35 promoter region and CG for the -10 promoter region were used, because they reflect the conserved promoter regions of the subgroup ECF01 of ECF sigma factors [14]. A global G + C content of 72% was used. The space between the -35 and -10 regions was specified to be between 17 to 21 base pairs. Initially DNA segments of 300 base pairs were examined for isolated genes and genes located at the beginning of likely operons. Visual inspection of sequences returned by PromoterHunter identified AACGG and CG as possible consensus sequences for the -35 and -10 promoter regions, respectively. PromoterHunter was used to search for these conserved sequences within DNA segments

of 1000 base pairs upstream of all of the genes in the regulon, in order to ensure that all instances of the sequences were identified.

## Supporting information

**S1 Fig. Genomic Islands 1 to 10 of *S. coelicolor* M145.** Only the genomic islands are shown and not the entire chromosome. Table 1 lists the strains used. To obtain these data, we used DNA microarrays that contained the 7825 predicted genes in the chromosome of *S. coelicolor* M145 [17]. Genomic DNA from *S. coelicolor* M145 was used as the reference sample and labeled with the green fluorescent dye Cy3. Genomic DNA samples from the five wild type strains each were labeled with the red fluorescent dye Cy5. The labeled DNA of each wild type strain was mixed with the labeled DNA of *S. coelicolor* M145 and hybridized to a microarray. Yellow spots on the microarrays represented genes at equal copy numbers between *S. coelicolor* M145 and the other strains. Green spots represented genes present in *S. coelicolor* M145 but absent in the other strains. Red spots represented genes at higher copy numbers in the strains relative to *S. coelicolor* M145. The yellow color is shown here as black for clarity. The maximum intensity of green corresponds to a 3-fold difference in signal on the microarrays for DNA in *S. coelicolor* M145 relative to DNA in the wild type strains. The green bars to the left of the GIs designate horizontally transferred genes in the genome sequence of *S. coelicolor* M145 that were predicted by Bentley et al. [3]. Regions of GIs not predicted by Bentley et al. lack a bar. Labels on the right indicate ORF numbers and genes with names.

**S2 Fig. Genomic Islands 11 to 18 of *S. coelicolor* M145.** See the text of S1 Fig.

**S3 Fig. Genomic Islands 19 to 22 of *S. coelicolor* M145.** See the text of S1 Fig.

**S4 Fig. The region of the *S. coelicolor* M145 chromosome that contains the regulon of the ECF sigma factor.** The figure was obtained from EnsemblBacteria [22]. SCO3478 is not shown.

**S5 Fig. Result from CCTOP for the putative anti-sigma factor encoded by SCO3451.** The putative anti-sigma factor is predicted to contain one transmembrane domain. The data were obtained from the Constrained Consensus TOPology (CCTOP) prediction server [28].

**S6 Fig. Predicted zinc finger in the putative anti-sigma factor encoded by SCO3451.** The data were obtained from UniProt [23].

**S7 Fig. Predicted zinc finger in the putative anti-sigma factor encoded by SCO3449.** The data were obtained from UniProt [23].

**S1 Table. Annotations of the regulon of the ECF Sigma Factor encoded by SCO3450.** Annotations were obtained from EnsemblBacteria [22] and UniProt [23]. For the UniProt BLASTs, parentheses denote genera and percent identities of similar proteins. Red text denotes putative enzymes. Blue text denotes proteins with homology to small regions of larger proteins.

**S2 Table. Annotations of Genomic Island 6, excluding the regulon of the ECF sigma factor encoded by SCO3450.** Annotations were obtained from EnsemblBacteria [22] and UniProt [23]. For the UniProt BLASTs, parentheses denote genera and percent identities of similar proteins. Red text denotes putative enzymes. Blue text denotes proteins with homology to small regions of larger proteins. See the text for additional details.

## Acknowledgments

We thank Thomas M. Privalsky for informing us about bioinformatic tools, Mark J. Buttner and David A. Hopwood for discussions about the data, and Mark J. Buttner for extremely helpful feedback on the manuscript.

## Author Contributions

CMK conceived the experiments. DW designed the experiments that compared the genomes of the six *Streptomyces* strains and performed those experiments with JAV,

M-LH, and KGP. NK designed the experiment overexpressing the ECF sigma factor and performed the experiment with SAG. CMK conducted the recent bioinformatic analyses and wrote the manuscript.

## References

1. Hopwood DA. *Streptomyces* in nature and medicine: the antibiotic makers. New York: Oxford University Press; 2007.
2. Kutzner HJ, Waksman SA. *Streptomyces coelicolor* Mueller and *Streptomyces violaceoruber* Waksman and Curtis, two distinctly different organisms. *J Bacteriol.* 1959 Oct;78(4):528–538.
3. Bentley SD, Chater KF, Cerdeño-Tárraga A-M, Challis GL, Thomson NR, James KD. Complete genome sequence of the model actinomycete *Streptomyces coelicolor* A3(2). *Nat.* 2002 May;417:141–147. doi: 10.1038/417141a.
4. Hopwood DA. Forty years of genetics with *Streptomyces*: from *in vivo* through *in vitro* to *in silico*. *Microbiol.* 1999 Sep;145:2183–2202. doi: 10.1099/00221287-145-9-2183.
5. Sermonti G, Spada-Sermonti I. Genetic recombination in *Streptomyces*. *Nat.* 1955 Jul;176(4472):121.
6. Bradley SG. Reciprocal crosses in *Streptomyces coelicolor*. *Genet.* 1960 May;45(5):613–619.
7. Lomovskaya ND, Mkrtumian NM, Gostimskaya NL, Danilenko VN. Characterization of temperate actinophage phi C31 isolated from *Streptomyces coelicolor* A3(2). *J Virol.* 1972 Feb;9(2):258–262.
8. Kieser T, Hopwood DA, Wright HM, Thompson CJ. pIJ101, a multi-copy broad host-range *Streptomyces* plasmid: functional analysis and development of DNA cloning vectors. *Mol Gen Genet.* 1982 185(2):223–228.
9. Aguilar A, Hopwood DA. Determination of methylenomycin A synthesis by the pSV1 plasmid from *Streptomyces violaceus-ruber* SANK 95570. *J Gen Microbiol.* 1982 Aug;128(8):1893–901. doi: 10.1099/00221287-128-8-1893.

10. Weaver D. Genome plasticity  
in *Streptomyces coelicolor*. Ph.D. Thesis, Stanford University. 2005. Available from:  
<https://search.proquest.com/pqdtlocal1005756/docview/305439567/2A4B3FBDB41844A5>
11. Jayapal KP, Lian W, Glod F, Sherman DH, Hu WS. Comparative genomic hybridizations reveal absence of large *Streptomyces coelicolor* genomic islands in *Streptomyces lividans*. BMC Genomics. 2007 Jul;8:229. doi: 10.1186/1471-2164-8-229.
12. Feklístov A, Sharon BD, Darst SA, Gross CA. Bacterial sigma factors: a historical, structural, and genomic perspective. Annu Rev Microbiol. 2014 Jun;68:357–376. doi: 10.1146/annurev-micro-092412-155737.
13. Lonetto MA, Brown KL, Rudd KE, Buttner MJ. Analysis of the *Streptomyces coelicolor* sigE gene reveals the existence of a subfamily of eubacterial RNA polymerase sigma factors involved in the regulation of extracytoplasmic functions. Proc Natl Acad Sci U S A. 1994 Aug;91(16):7573–7577.
14. Staroń A, Sofia HJ, Dietrich S, Ulrich LE, Liesegang H, Mascher T. The third pillar of bacterial signal transduction: classification of the extracytoplasmic function (ECF)  $\sigma$  factor protein family. Mol Microbiol. 2009 Nov;74(3):557–581. doi: 10.1111/j.1365-2958.2009.06870.x.
15. ECFfinder. Available from: <http://ecf.g2l.bio.uni-goettingen.de:8080/ECFfinder/>
16. Takano E, White J, Thompson CJ, Bibb MJ. Construction of thiostrepton-inducible, high-copy-number expression vectors for use in *Streptomyces* spp. Gene. 1995 Dec;166(1):133-137. doi: 10.1016/0378-1119(95)00545-2.
17. Huang J, Lih C-J, Pan K-H, Cohen SN. Global analysis of growth phase responsive gene expression and regulation of antibiotic biosynthetic pathways in *Streptomyces coelicolor* using DNA microarrays. Genes Dev. 2001 15:3183-3192. doi: 10.1101/gad.943401.

18. Grass G, Große C, Nies DH. Regulation of the *cnr* cobalt and nickel resistance determinant from *Ralstonia* sp. strain CH34. *J Bacteriol.* 2000 Mar 182(5):1390–1398. doi: 10.1128/JB.182.5.1390-1398.2000.
19. Tibazarwa C, Wuertz S, Mergeay M, Wyns L, van der Lelie D. Regulation of the *cnr* cobalt and nickel resistance determinant of *Ralstonia eutropha* (*Alcaligenes eutrophus*) CH34. *J Bacteriol.* 2000 Mar 182(5):1399–1409. doi: 10.1128/JB.182.5.1399-1409.2000.
20. Jeong Y, Kim J-N, Kim MW, Bucca G, Cho S, Yoon YJ, et al. The dynamic transcriptional and translational landscape of the model antibiotic producer *Streptomyces coelicolor* A3(2). *Nat Commun.* 2016 Jun;7:11605. doi: 10.1038/ncomms11605.
21. Klucar L, Stano M, Hajduk M. phiSITE: database of gene regulation in bacteriophages. *Nucleic Acids Res.* 2010 Jan;38(Database Issue): D366–D370. doi: 10.1093/nar/gkp911.
22. Kersey PJ, Allen JE, Allot A, Barba M, Boddie S, Bolt BJ, et al. Ensembl Genomes 2018: an integrated omics infrastructure for non-vertebrate species. *Nucleic Acids Res.* 2018 Forthcoming.
23. The UniProt Consortium. UniProt: the universal protein knowledgebase. *Nucleic Acids Res.* 2017 Jan;45(D1):D158–D169. doi: 10.1093/nar/gkw1099.
24. Koonin EV, Tatusov RL. Computer analysis of bacterial haloacid dehalogenases defines a large superfamily of hydrolases with diverse specificity: application of an iterative approach to database search. *J Mol Biol.* 1994 Nov 244(1):125–132. doi: 10.1006/jmbi.1994.1711.
25. Janssen DB, Oppentocht JE, Poelarends GJ. Microbial dehalogenation. *Curr Opin Biotechnol.* 2001 Jun 12(3):254–258. doi: 10.1016/S0958-1669(00)00208-1.
26. van Pée KH. Biosynthesis of halogenated metabolites by bacteria. *Annu Rev Microbiol.* 1996 50:375–399.



27. Řezanka T, Spížek J. Halogen-containing antibiotics from Streptomycetes. In Atta-ur-Rahman, editor. Studies in natural products chemistry. 2003 29(Part J):309–353. doi: 10.1016/S1572-5995(03)80010-8.
28. Dobson L, Reményi R, Tusnády GE. CCTOP: a Consensus Constrained TOPology prediction web server. Nucleic Acids Res. 2015 Jul;43(W1):W408–W412. doi: 10.1093/nar/gkv451.
29. Finn RD, Attwood TK, Babbitt PC, Bateman A, Bork P, Bridge AJ, et al. InterPro in 2017—beyond protein family and domain annotations. Nucleic Acids Res. 2017 Jan;45(Database issue):D190–D199. doi: 10.1093/nar/gkw1107.
30. Temuujin U, Chi W-J, Lee S-Y, Chang Y-K, Hong S-K. Overexpression and biochemical characterization of DagA from *Streptomyces coelicolor* A3(2): an endo-type  $\beta$ -agarase producing neoagarotetraose and neoagarohexaose. Appl Microbiol Biotechnol. 2011 Nov;92(4):749–759. doi: 10.1007/s00253-011-3347-7.
31. Bibb MJ, Jones GH, Joseph R, Buttner MJ, Ward JM. The agarase gene (*dagA*) of *Streptomyces coelicolor* A3(2): affinity purification and characterization of the cloned gene product. Microbiol. 1987 Aug;133:2089–2096. doi: 10.1099/00221287-133-8-2089.
32. Huang J, Shi J, Molle V, Sohlberg B, Weaver D, Bibb MJ, et al. Cross-regulation among disparate antibiotic biosynthetic pathways of *Streptomyces coelicolor*. Mol Microbiol. 2005 Nov;58(5):1276–1287. doi: 10.1111/j.1365-2958.2005.04879.x.
33. Kieser T, Bibb MJ, Buttner MJ, Chater KF, Hopwood DA. Practical *Streptomyces* genetics. John Innes Foundation; 2000.
34. Weaver D, Karoonuthaisiri K, Tsai H-H, Huang C-H, Ho M-H, Gai S, et al. Genome plasticity in *Streptomyces*: identification of 1 Mb TIRs in the *S. coelicolor* A3(2) chromosome. Mol Microbiol. 2004 Mar;51(6):1535–1550. doi: 10.1111/j.1365-2958.2003.03920.x.

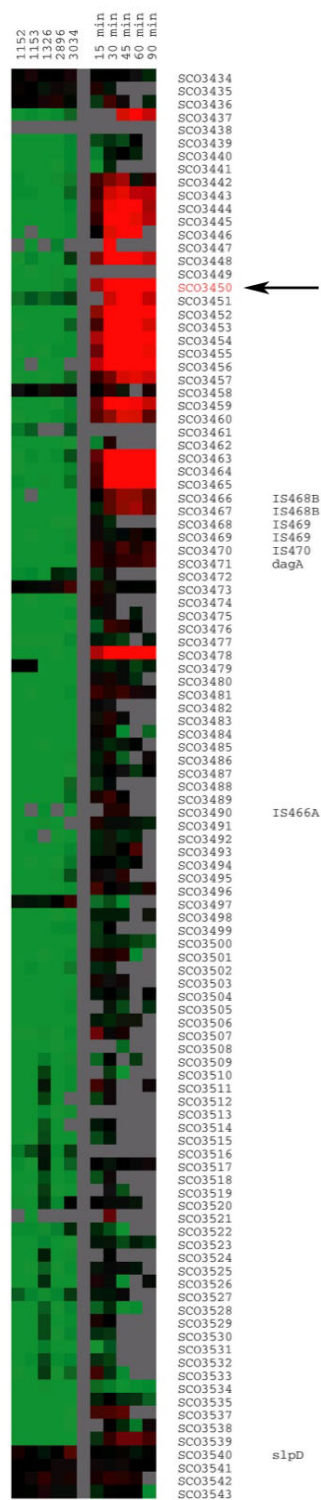

Figure 1

```
SCO3437-1 CGTTGCCGACAACGGGATGATGATCCTCGG--CGACCTCAACCA (694 bp)
SCO3437-2 CGTCGCCGACAACGGGATGATGATCCTCGG--CGACCTCAACCA (283 bp)
SCO3438 CAGGTCCCGCAACGGCGCACCCCTCGTGGG--CGGTGCCCGCGG (178 bp)
SCO3442 GTGGTGGTGGAACGGCACCTGGCTGCCGAGTCCGTGCCGCCCG (407 bp)
SCO3443 CGACCAGGCCAACGGCGCGCTACCTCGCCACGACGCCGACCCGG (158 bp)
SCO3445 ACGGCCTGGAAACGGCGTGCTCCTGAGCCG--CGTGCGTCAATG (7 bp)
SCO3448 TCGATGGCGAAACGGACGAGGTCACCGCACGCCGGGTCGCGGCC (295 bp)
SCO3451 TTCCCGTCGAAACGGTCGATGGCCCGGTAGGCGCGCAGCAAGGT (312 bp)
SCO3455-1 GGTGTGGGTCAACGGAGAGAACTCCGCAC--CGGAAAGCAGGC (883 bp)
SCO3455-2 CTGGACCAGGAACGGCTGCCCGAGCAGTGG--CGAGAGAAGTTC (150 bp)
SCO3456 GTTTCCGCGCAACGGATGTTCGCGGACCGTCGCGCGGAAACA (50 bp)
SCO3457 GTTCGCGGAAACGGAACACGGCCGGTGT--CGCAGGCTTCCC (58 bp)
SCO3458 GCGTGTCCGAAACGGAATGCGTGACCAGCC--CGGCAGGGTTCC (844 bp)
SCO3459 GTCGCTGGTCAACGGCCCCTCTCGACCAGGCCGGGGATCGGCA (611 bp)
SCO3462 CCGAGGCCGTAACGGCCCTCTGGTTTCTCGCCCGGCCCCGCTCC (276 bp)
SCO3463 CCACCCGAGAACGGAACCCTCGTCCCCGCTGCGTACAGCAGC (145 bp)
-35 -10
```

Figure 2
